# Supplementary material for: Eukaryotic CRFK Cells Motion Characterized with Atomic Force Microscopy
Source: Int J Mol Sci. 2022 Nov 19;23(22):14369. doi: 10.3390/ijms232214369 (PMC9692694; doi:10.3390/ijms232214369)
Supplement: Supplementary file 1 [file ijms-23-14369-s001.zip › Supplementary Material.pdf]

# **Eukaryotic CRFK cells motion characterized with atomic force microscopy**

Maria Zamora-Ceballos <sup>1</sup>, Juan Barcena <sup>2</sup> and Johann Mertens <sup>1</sup>

<sup>1</sup> Madrid Institute for Advanced Studies in Nanoscience (IMDEA Nanoscience), Campus de Cantoblanco, 28049 Madrid, Spain

<sup>2</sup> Centro de Investigación en Sanidad Animal (CISA-INIA/CSIC), Valdeolmos, 28130 Madrid, Spain.

Table S1

| cell | length | width | type of movement        | distance          | speed    |
|------|--------|-------|-------------------------|-------------------|----------|
|      | (nm)   | (nm)  |                         | ( $\mu\text{m}$ ) | (nm/min) |
| 1    | 81     | 23    | changing direction      | 8                 | 57       |
| 2    | >98    | 16    | linear                  | 14                | 96       |
| 3    | 80     | 18    | linear                  | 17                | 115      |
| 4    | 66     | 21    | changing direction      | 7                 | 48       |
| 5    | 51     | 20    | linear                  | 48                | 324      |
| 6    | >60    | 28    | linear                  | 23                | 154      |
| 7    | 34     | 28    | changing direction      | 23                | 243      |
| 8    | 41     | 23    | stop                    | 8                 | 54       |
| 9    | 48     | 28    | linear                  | 28                | 189      |
| 10   | 98     | 14    | linear                  | 65                | 439      |
| 11   | 67     | 19    | stop                    | 14                | 95       |
| 12   | 49     | 22    | stop/changing direction | 10                | 70       |
| 13   | 47     | 22    | stop                    | 9                 | 61       |
| 14   | 61     | 16    | linear                  | 14                | 92       |
| 15   | 63     | 25    | stop                    | 7                 | 50       |
| 16   | 34     | 36    | changing direction      | 14                | 93       |
| 17   | 81     | 20    | linear                  | 45                | 309      |
| 18   | 91     | 29    | linear                  | 17                | 116      |
| 19   | 104    | 23    | linear                  | 16                | 112      |
| 20   | 54     | 33    | stop                    | 8                 | 56       |
| 21   | 106    | 19    | linear (up and down)    | 43                | 29       |
| 22   | 94     | 13    | linear (up and down)    | 15                | 101      |
| 23   | 44     | 38    | stop                    | 11                | 72       |
| 24   | 84     | 31    | changing direction      | 14                | 97       |
| 25   | 84     | 22    | linear (up and down)    | 24                | 163      |
| 26   | >36    | 14    | linear                  | 15                | 102      |
| 27   | 64     | 47    | linear                  | 24                | 166      |
| 28   | 67     | 33    | changing direction      | 17                | 114      |
| 29   | >49    | 40    | changing direction      | 37                | 253      |
| 30   | 67     | 32    | linear                  | 12                | 85       |
| 31   | 62     | 31    | stop                    | 8                 | 53       |

**Table S1:** Optical microscope characterization of the motion of CRFK cell onto glass substrates shows the dynamics and morphologies of the cells as well as the nature of their motion during displacement.

Figure S1

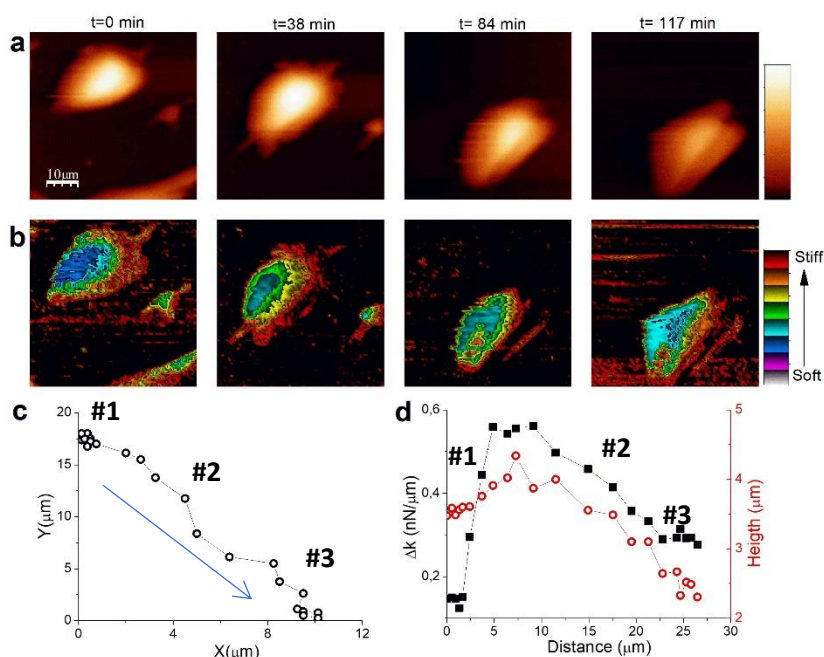

**Figure S1.** Series of **a)** topographic (Z-scale = 4  $\mu\text{m}$ ) and **b)** Spring constant  $k$  (Z-scale: 2  $\text{nN}/\mu\text{m}$ ), images (50  $\mu\text{m} \times 50 \mu\text{m}$ ) recorded in real time for a single CRFK cell during its motion on glass surface for  $t = 0, 38, 84$  and  $117$  min. respectively. **c)** Trajectory of the cell plotted as the position of the cell for the aligned images. **d)** Plot of  $\Delta k_{\text{rear-front}}$  (black) and cell maximum height (red), as function of the cell's traveled distance.

Time-lapse AFM images were recorded in cells culture medium (DMEM) at 37  $^{\circ}\text{C}$ . 22 successive images were collected at fixed time intervals of  $\approx 6$  minutes. We monitored the topography (**Figure S1a**) and spring constant (**Figure S1b**) response of the cell during its motion at glass slide surface. During the first 30 minutes, the cell is almost stopped (**Figure S1c**). This phase 1 (#1) is characterized by constant  $\Delta k \approx 0.1 \text{ nN}/\mu\text{m}$  and height  $\approx 3.5 \mu\text{m}$  (**Figure S1d**). The cells start moving when  $\Delta k$  increase up to  $\approx 0.55 \text{ nN}/\mu\text{m}$  and cell height reaches  $\approx 5 \mu\text{m}$ . During this linear motion (#2), the cell travels  $\approx 10 \mu\text{m}$ ,  $\Delta k$  and cell height decrease linearly to  $\approx 0.3 \text{ nN}/\mu\text{m}$  and  $\approx 3.5 \mu\text{m}$  respectively until the cell stops again in a phase 3 (#3) where  $\Delta k$  and the cell height keep unchanged again.

Figure S2

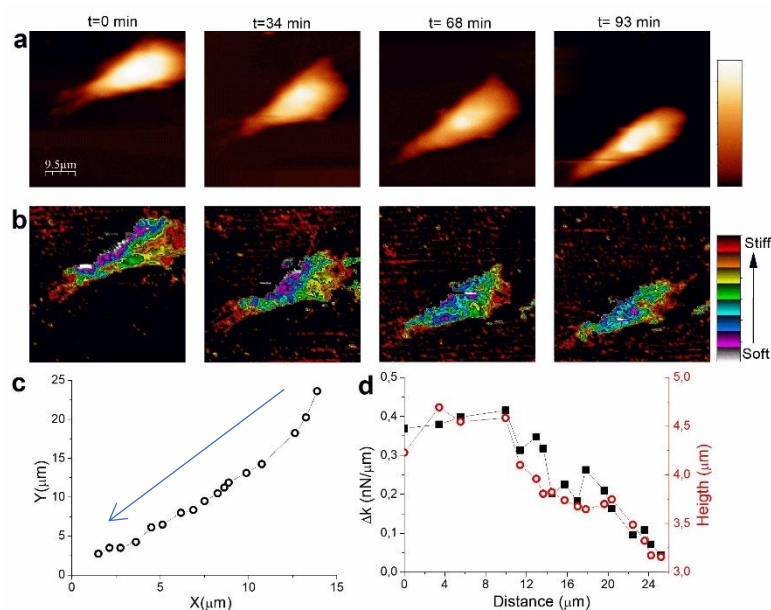

**Figure S2.** Series of **a)** topographic (Z-scale = 4  $\mu\text{m}$ ) and **b)** Spring constant  $k$  (Z-scale: 3.6  $\text{nN}/\mu\text{m}$ ), images ( $50 \mu\text{m} \times 50 \mu\text{m}$ ) recorded in real time for a single CRFK cell during its motion on glass surface for  $t = 0, 28, 57$  and  $86$  min. respectively. **c)** Trajectory of the cell plotted as the position of the cell for the aligned images. **d)** Plot of  $\Delta k_{\text{rear-front}}$  (black) and cell maximum height (red), as function of the cell's traveled distance.

Time-lapse AFM images were recorded in cells culture medium (DMEM) at  $37^\circ\text{C}$ . 17 Successive images were collected at fixed time intervals of  $\approx 6$  minutes. We monitored the topography (**Figure S2a**) and spring constant (**Figure S2b**) response of the cell during its motion at glass slide surface. The cell travels  $25 \mu\text{m}$  mainly from the upper right to the center of the image (**Figure S2c**, blue arrow). During the linear motion,  $\Delta k$  and cell height decrease linearly from  $\approx 0.4$  to  $\approx 0.05 \text{ nN}/\mu\text{m}$  and from  $\approx 4.5$  to  $3.2 \mu\text{m}$  respectively (**Figure S2d**). Surprisingly the cell does not move along its large axis and it rotates slightly counterclockwise while moving.

Figure S3

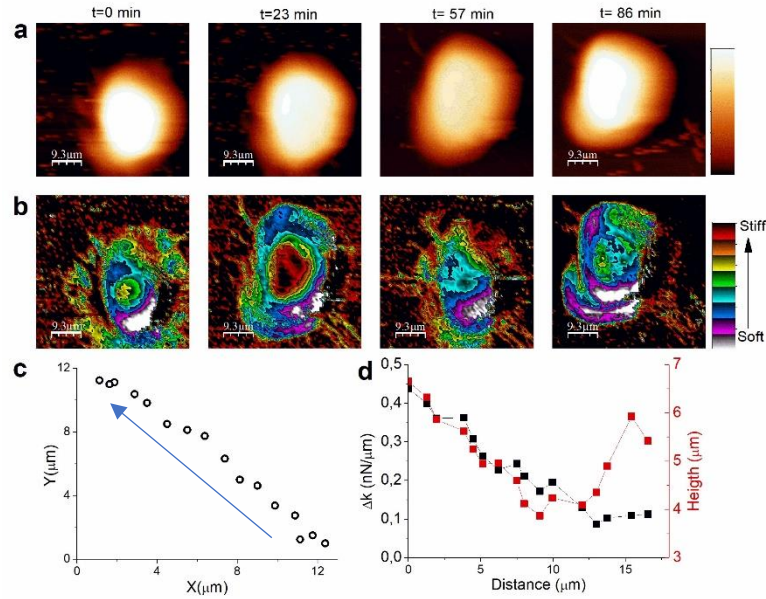

**Figure S3.** Series of **a)** topographic (Z-scale = 5  $\mu\text{m}$ ) and **b)** Spring constant  $k$  (Z-scale: 1.2  $\text{nN}/\mu\text{m}$ ), images (50  $\mu\text{m} \times 50 \mu\text{m}$ ) recorded in real time for a single CRFK cell during its motion on glass surface for  $t = 0, 23, 57$  and  $86$  min. respectively. **c)** Trajectory of the cell plotted as the position of the cell for the aligned images. **d)** Plot of  $\Delta k_{\text{rear-front}}$  (black) and cell maximum height (red), as function of the cell's traveled distance.

Time-lapse AFM images were recorded in cells culture medium (DMEM) at 37  $^{\circ}\text{C}$ . 16 successive images were collected at fixed time intervals of  $\approx 6$  minutes. We monitored the topography (**Figure S3a**) and spring constant (**Figure S3b**) response of the cell during its motion at glass slide surface. The cell shows a linear change in position traveling 17  $\mu\text{m}$  from the bottom left to the upper right of the image (**Figure S3c**, **blue arrow**). During the linear motion,  $\Delta k$  and cell height decrease linearly from  $\approx 0.45$  to  $\approx 0.1$   $\text{nN}/\mu\text{m}$  and from  $\approx 6.5$  to 4  $\mu\text{m}$  respectively (**Figure S3d**) until the cell nearly stop. Then the cell height increases again to  $\approx 6$   $\mu\text{m}$  during the last 20 minutes of the experiment.

Figure S4

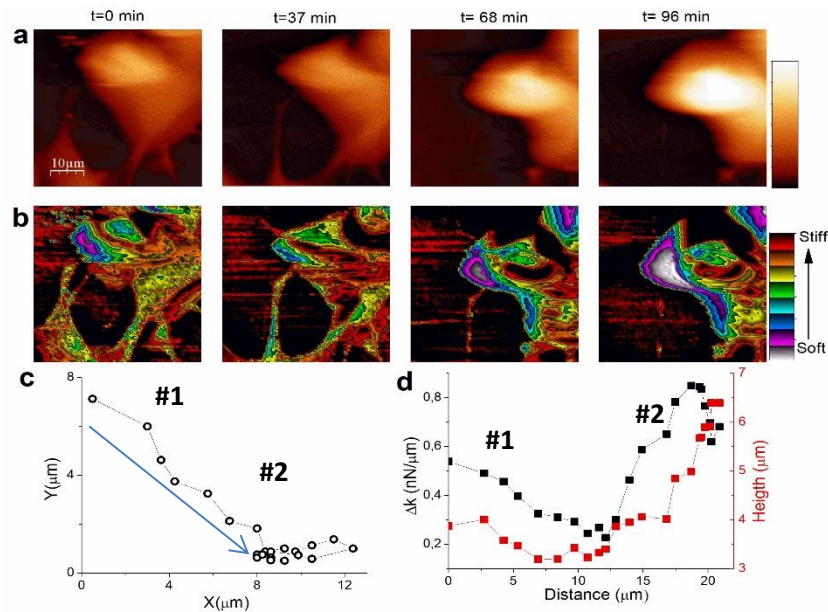

**Figure S4.** Series of **a)** topographic (Z-scale = 6  $\mu\text{m}$ ) and **b)** Spring constant  $k$  (Z-scale: 1.5  $\text{nN}/\mu\text{m}$ ), images (50  $\mu\text{m} \times 50 \mu\text{m}$ ) recorded in real time for a single CRFK cell during its motion on glass surface for  $t = 0, 37, 68$  and  $96$  min. respectively. **c)** Trajectory of the cell plotted as the position of the cell for the aligned images. **d)** Plot of  $\Delta k_{\text{rear-front}}$  (black) and cell maximum height (red), as function of the cell's traveled distance.

Time-lapse AFM images were recorded in cells culture medium (DMEM) at  $37^\circ\text{C}$ . 22 successive images were collected at fixed time intervals of  $\approx 6$  minutes. We monitored the topography (**Figure S4a**) and spring constant (**Figure S4b**) response of the cell during its motion at glass slide surface. This cell is strongly connected to its neighboring cells from the upper left and the bottom of the image. During the first 50 minutes (blue arrow), the cell linearly travels 8  $\mu\text{m}$  (**Figure S4c**, #1).  $\Delta k$  and cell height decrease linearly from  $\approx 0.55$  to  $0.2$   $\text{nN}/\mu\text{m}$  and from  $\approx 4$  to  $3$   $\mu\text{m}$  respectively (**Figure S4d**). The second phase (#2) is more complex as the cell changes its direction. The cell is still moving but it also rotates counter clockwise to orientate following the X-axis then nearly stops. While rotating,  $\Delta k$  and cell height increases from  $\approx 0.2$  to  $0.7$   $\text{nN}/\mu\text{m}$  and from  $\approx 3$  to  $6.5$   $\mu\text{m}$  respectively.

Figure S5

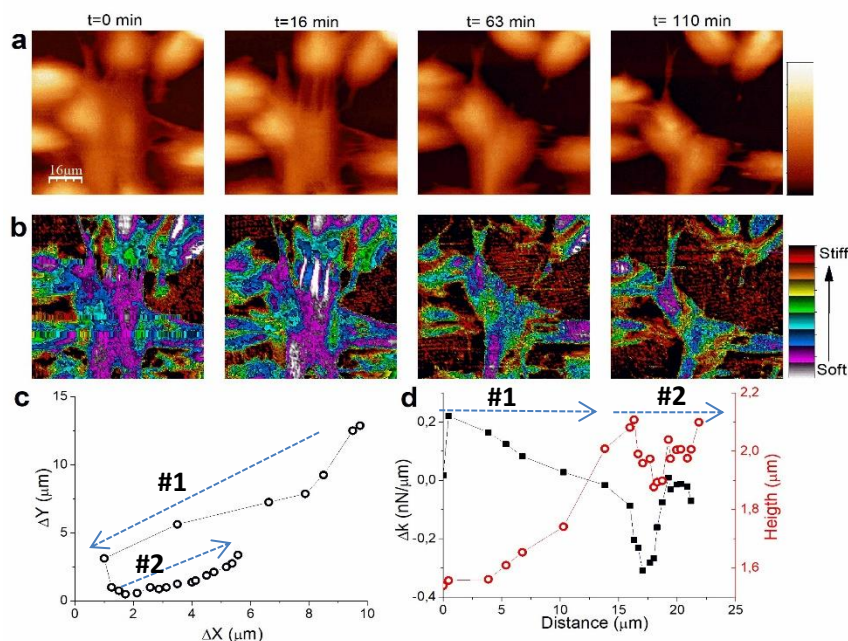

**Figure S5.** Series of **a)** topographic (Z-scale = 4  $\mu\text{m}$ ) and **b)** Spring constant  $k$  (Z-scale: 2  $\text{nN}/\mu\text{m}$ ), images (80  $\mu\text{m} \times 80 \mu\text{m}$ ) recorded in real time for a single CRFK cell during its motion on glass surface for  $t = 0, 16, 63$  and  $110$  min. respectively. **c)** Trajectory of the cell plotted as the position of the cell for the aligned images. **d)** Plot of  $\Delta k_{\text{rear-front}}$  (black) and cell maximum height (red), as function of the cell's traveled distance.

Time-lapse AFM images were recorded in cells culture medium (DMEM) at 37  $^{\circ}\text{C}$ . 22 successive images were collected at fixed time intervals of  $\approx 6$  minutes. We monitored the topography (**Figure S5a**) and spring constant (**Figure S5b**) response of the cell during its motion at glass slide surface. We characterized the motion central cell (dotted blue circle), because it showed the largest changes in position during the measurements. The cell starts moving downward about 10  $\mu\text{m}$  and left (about 9  $\mu\text{m}$ ), during 40 min (**Figure S5c, #1**). This movement is characterized by a decrease in the  $k$  cell junctions to the upper cell (**Figure S5b, Image 2, red arrow**). Then it stops and changes direction to move slower in the opposite direction during the rest of the experiment (# 2). During the phase 1 (#1),  $\Delta k$  (**Figure S5d, black curve**) is positive to  $\approx 0.2 \text{ nN}/\mu\text{m}$  and decreases linearly until the cell stops when  $\Delta k = 0 \text{ nN}/\mu\text{m}$ . Cell height (**Figure S5d, red curve**) increases from  $\approx 1.6$  to  $2.1 \mu\text{m}$  because the cell detaches from the upper cell when softer junctions break, leading to a change in cell spreading during motion. Then  $k$  reverses and becomes negative to  $\Delta k = -0.35 \text{ nN}/\mu\text{m}$  during phase 2 (#2) as the cell changes its trajectory to move to the opposite direction. Cell height decreases when  $k$  dissymmetry increases emphasizing the link between cytoskeleton reorganization and cell morphology.

**Description of the additional Supplementary Movie.**

226 min JM-AFM of 40 images sequence of the CRFK cell motion after images correlation to correct for drift. Movie parameters: frame size: 73  $\mu\text{m}$ . Full color Z-scale: 3  $\mu\text{m}$ . Image acquisition speed: 10 Hz.
